# Supplementary material
Source: PubMed Central journal article supplement (PMC4644659)

## 1 SUPPLEMENTAL INFORMATION

2

### 3 SUPPLEMENTARY TEXT

#### 4 **Properties of GRM encapsulation peptides (EPs)**

5 *Glycyl radical enzymes.* Secondary structure prediction of the putative N-terminal EPs of the  
6 GRM1 GREs yielded two consecutive  $\alpha$ -helices instead of just one as is typically found in the EPs of  
7 other types of BMCs (1). Each of the helices is about 12 amino acids long. They are separated by ~4  
8 residues predicted to be disordered, which may constitute a turn between the helices. A predicted  
9 unordered ~30 amino acid long linker connects the two helices to the N-terminal domain of the GRE.  
10 Similarly, secondary structure predictions for the insertion domains in the GRM3 and GRM5 GREs  
11 yielded two central  $\alpha$ -helices, ~15 residues each. The helices appear to be connected to one another via  
12 a short (~5 residues) loop and are flanked by unordered, poorly conserved linkers (15 residues each on  
13 average). In the case of the GRM3 GREs only the first of the two helices shows the characteristic  
14 amphipathicity of EPs, whereas the second helix does not. Thus, the insertion in the GRM3 GREs  
15 resembles the N-terminal extension of the GRM1 GREs. In contrast, in the GRM5 GREs both helices  
16 of the insertion appear to be amphipathic. The GRM4 GREs provide yet another variation by  
17 containing only one amphipathic  $\alpha$ -helix of 15 residues length within this insertion.

18 *Aldehyde dehydrogenases.* The GRM1 and GRM2 AldDHs exhibit C-terminal extensions of  
19 ~50-100 and ~80-100 residues, respectively. The characteristic predicted amphipathic helix of an EP is  
20 found at the ends of these extension. In contrast, the GRM3-5 AldDHs contain N-terminal extensions  
21 ranging from 30 up to 100 residues in length. These extensions exhibit the characteristics of EPs, *i.e.*  
22 long flexible linkers (usually 10-20 residues) and predicted amphipathic  $\alpha$ -helices of 12-15 residues  
23 (1). Some GRM3 AldDHs (for example from *Rhodopseudomonas palustris* and *Rhodospirillum*  
24 *rubrum*) contain two amphipathic helices (12-15 residues each), which are separated from one another

25 by long linkers (~20 residues) in the N-terminal extension. This type of EP resembles the ones found in  
26 the GRM1, 3, and 5 GREs, which also comprise two  $\alpha$ -helices and appears to be a unique feature of  
27 GRMs in comparison to other characterized BMCs.

28

### 29 **Loci encoding GREs of Unknown Function (GUF)**

30 Genomes of the GRM1 encoding organisms *D. dehalogenans*, *D. hafniense* DCB-2 & Y51, and  
31 *D. psychrophila* also contain an additional BMC gene cluster that we designate GUF loci. The GREs in  
32 these loci do not contain any obvious EPs, and are oriented in the opposite direction of the rest of the  
33 genes in the loci (except in *D. psychrophila*); all other known BMC loci encode their signature  
34 enzymes and other components in the same orientation (2). Phylogenetically, the GUFs appear to be  
35 more closely related to non-encapsulated GREs (Fig. 2A). Given these observations, we predict that  
36 these GUFs are not packaged into BMCs. Nevertheless, the GUF loci appear to encode all other  
37 required interior constituents of a functional BMC, with the exception of an alcohol dehydrogenase  
38 gene. Interestingly, the GRM1 locus of *D. psychrophila* only encodes a non-functional AldDH,  
39 whereas the GUF locus harbors genes for two (seemingly functional) AldDHs. They cluster together  
40 with EutE from *Salmonella enterica*, the AldDH of the canonical EUT-BMC (Fig. 2D in the main text).  
41 This is due to an apparent partial duplication within this GUF locus. All other GUF loci only encode  
42 one functional AldDH, which phylogenetically cluster closely together with AldDHs of GRM1 loci.  
43 Moreover, the GUF loci in *D. dehalogenans*, *D. hafniense* DCB-2 and Y51 only encode two BMC-Hs  
44 (Dataset S1) meaning these GUF loci may not form functional organelles on their own. However, it is  
45 possible that the genes in the GRM1 loci could complement the deficiencies of the GUF loci and their  
46 co-expression results in a functional metabolosome. The situation appears to be reversed in *D.*  
47 *psychrophila*, where the GRM1 locus lacks a BMC-P gene and only encodes a single BMC-H, whereas  
48 the GUF locus encodes six BMC-Hs as well as a BMC-P. Collectively, these observations support the

49 hypothesis that cooperative expression of both GRM1 and GUF loci in *D. dehalogenans*, *D. hafniense*  
50 DCB-2 & Y51, as well as *D. psychrophila* is required for the formation of a functional BMC.

51

## 52 **Locus type reclassifications**

53 As mentioned in the main text three loci (in *C. ljungdahlii*, *D. meridiei*, and *D. orientis*) that were  
54 previously annotated as belonging to the GRM3 type (2) were re-classified as GRM1 based on the  
55 phylogenetic analysis for the signature as well as the core enzymes. In detail, the GREs, the AEs, the  
56 AldDHs, and the PTACs of the corresponding loci cluster together with their counterparts of the GRM1  
57 loci in the respective phylogenetic trees. Moreover, the corresponding loci in *C. ljungdahlii*, *D.*  
58 *meridiei* also encode an additional ‘dud’ AldDH. All three loci harbor a predicted choline/ethanolamine  
59 kinase gene, further supporting their reclassification as GRM1 loci.

60

## 61 **Ancillary Enzymes/Proteins of GRM Loci**

62 In addition to signature and core enzymes, BMC loci typically encode additional  
63 proteins/enzymes that are likely not directly involved in the degradation of a substrate, but instead  
64 provide supporting functions, such as co-factor recycling, and integration of the BMC function with the  
65 cytoplasm of the host and its environment (2, 3). These include genes encoding putative zinc-  
66 containing alcohol dehydrogenases in GRM5 loci, acyl kinases in GRM3 loci, putative  
67 S-adenosylmethionine synthetases in a subset of GRM3 loci, (putative) cobalamin reductases, a EutJ  
68 homolog (in most GRM1 and GRM3 loci), and various putative metabolite transporters of the cell  
69 membrane. Each GRM locus also appears to have its own (set of) transcription factor(s). The GRM1  
70 loci encode a transcription factor of the MerR family, with a small molecule binding domain. GRM2  
71 loci encode regulatory proteins of the TetR and LysR families. GRM3 and GRM4 loci encode

72 regulatory proteins of the PocR and AraC families with domains associated with two-component  
73 signaling systems. GRM5 loci have a transcription factor of the DeoR family.

74

### 75 **Incomplete Shell Compositions of GRM Loci**

76 The GRM1 loci of *D. psychrophila* and *Clostridium tetani* lack genes encoding BMC-P  
77 orthologs, the pentameric proteins that presumably cap the vertices of an icosahedral shell.  
78 Furthermore, those two loci encode only one or two BMC-H proteins, respectively, which is a  
79 relatively low number; the average number of genes encoding BMC-H proteins per BMC locus is 3.5  
80 (2) and up to 5.5 for GRM1 loci. However, *D. psychrophila* also harbors a GUF locus containing two  
81 BMC-P genes, an apparent duplication. It is, therefore, possible that in *D. psychrophila* the GUF locus  
82 complements the GRM1 locus. However, no genes encoding BMC-Ps can be found anywhere in the  
83 genome of *C. tetani* which otherwise has all of the GRM1 lumen protein genes intact.

84

### 85 **GRM fusion loci**

86 ***GRM1/GRM3 fusion.*** The two distinct GRM loci present in the genome of *C. ljungdahlii* may  
87 instantiate an intermediate stage in the evolution of GRMs. It was surprising that the GRE and AE from  
88 the two loci, fell within different phylogenetic clades (GRM1 or GRM3), while the AldDH and PTAC  
89 from both loci were nested within the GRM1-associated clades. Upon closer inspection, it is apparent  
90 that two sections of the locus that contained a gene encoding the choline TMA-lyase type GRE  
91 (GRM1) had surprisingly high sequence identity (98%) with a large segment of the other locus  
92 containing the propanediol dehydratase type GRE (Fig. S6). This duplication apparently includes genes  
93 that are critical for GRM structure and function, such as those coding for BMC-H and BMC-P proteins,  
94 an AldDH, as well as a PTAC. Given the phylogenetic distribution of the GRE, AE, AldDH and PTAC,  
95 we inferred that a portion of a GRM1 locus was duplicated and inserted adjacent to an incomplete

96 GRM3 locus, thereby completing the locus as a whole structurally and enzymatically (Fig. S6). Two  
97 genes in the duplicated region appear to have been lost; interestingly, one of them is a BMC-T protein  
98 (Fig. S6). Since the incomplete GRM3 locus contained a BMC-T protein, it may be that the GRM1  
99 BMC-T was redundant and eventually lost. Whether or not this hybrid GRM1/GRM3 locus is  
100 functional can only be determined via experimentation. We expect that the GRM1-derived AldDH and  
101 PTAC exhibit some promiscuity, accepting propionaldehyde and propionyl-CoA as substrates,  
102 respectively (see Fig. 1B for comparison). Their enzymatic efficiency will likely improve over time due  
103 to selective pressures. Based on the sequence identity, this duplication/transfer event must have  
104 happened very recently, providing us a snapshot of a potential mechanism for functional divergence of  
105 GRM loci.

106 ***PDU/GRM2 fusion.*** A PDU/GRM2 fusion locus in *Escherichia fergusonii* was found to contain  
107 genes encoding a GRM2 GRE (see Fig. 2A), its activating enzyme, all of the subunits of a B<sub>12</sub>-  
108 dependent propanediol dehydratase, as well as two genes encoding PduL (phosphotransacylase)  
109 homologs. One of these PduL homologs clusters together with GRM2 PTACs, whereas the other one  
110 was closely related to PduL from the PDU locus of *Salmonella enterica* (Fig. 2E). These observations  
111 may indicate that this PDU/GRM2 locus has a dual-function, being used for the simultaneous  
112 degradation of propanediol and choline.

113

114 **SUPPLEMENTAL REFERENCES**

115

116 1. **Aussignargues C, Paasch BC, Gonzalez-Esquer R, Erbilgin O, Kerfeld CA.** 2015. Bacterial  
117 Microcompartment Assembly: The Key Role of Encapsulation Peptides. *Commun Integr Biol*  
118 **8:e1039755.**

119 2. **Axen SD, Erbilgin O, Kerfeld CA.** 2014. A Taxonomy of Bacterial Microcompartment Loci  
120 Constructed by a Novel Scoring Method. *PLoS Comput Biol* **10.**

121 3. **Kerfeld CA, Erbilgin O.** 2015. Bacterial microcompartments and the modular construction of  
122 microbial metabolism. *Trends Microbiol* **23:22-34.**

123

**Table S1. BMC associated glycy radical enzymes included in this study**

| Species                                           | Locus type | Accession    |
|---------------------------------------------------|------------|--------------|
| <i>Alkaliphilus metalliredigens</i> QYMF          | GRM1       | YP_001321612 |
| <i>Alkaliphilus oremlandii</i> OhILAs             | GRM1       | YP_001513926 |
| <i>Clostridium botulinum</i> A str. ATCC 3502     | GRM1       | YP_001254614 |
| <i>Clostridium botulinum</i> A3 str. Loch Maree   | GRM1       | YP_001787508 |
| <i>Clostridium botulinum</i> B str. Eklund 17B    | GRM1       | YP_001885647 |
| <i>Clostridium botulinum</i> B1 str. Okra         | GRM1       | YP_001781665 |
| <i>Clostridium botulinum</i> Ba4 str. 657         | GRM1       | YP_002863094 |
| <i>Clostridium botulinum</i> BKT015925            | GRM1       | YP_004396407 |
| <i>Clostridium botulinum</i> E3 str. Alaska E43   | GRM1       | YP_001920768 |
| <i>Clostridium botulinum</i> F str. Langeland     | GRM1       | YP_001391412 |
| <i>Clostridium botulinum</i> H04402 065           | GRM1       | YP_005678666 |
| <i>Clostridium phytofermentans</i> ISDg           | GRM1       | YP_001558531 |
| <i>Clostridium saccharolyticum</i> WM1            | GRM1       | YP_003824152 |
| <i>Clostridium tetani</i> E88                     | GRM1       | NP_782070    |
| <i>Desulfotobacterium dehalogenans</i> ATCC 51507 | GRM1       | YP_006432251 |
| <i>Desulfotobacterium hafniense</i> DCB-2         | GRM1       | YP_002461335 |
| <i>Desulfotobacterium hafniense</i> Y51           | GRM1       | YP_521239    |
| <i>Desulfosporosinus acidiphilus</i> SJ4          | GRM1       | YP_006465906 |
| <i>Desulfotalea psychrophila</i> LSv54            | GRM1       | YP_065559    |
| <i>Desulfotomaculum reducens</i> MI-1             | GRM1       | YP_001114603 |
| <i>Desulfotomaculum ruminis</i> DSM 2154          | GRM1       | YP_004545628 |
| <i>Desulfovibrio alaskensis</i> G20               | GRM1       | YP_389771    |
| <i>Desulfovibrio desulfuricans</i> ATCC 27774     | GRM1       | YP_002479937 |
| <i>Desulfovibrio hydrothermalis</i> AM13          | GRM1       | YP_007325732 |
| <i>Desulfovibrio salexigens</i> DSM 2638          | GRM1       | YP_002990074 |
| <i>Olsenella uli</i> DSM 7084                     | GRM1       | YP_003800310 |
| <i>Streptococcus dysgalactiae</i> ATCC 12394      | GRM1       | YP_006013997 |
| <i>Streptococcus dysgalactiae</i> RE378           | GRM1       | YP_006860442 |
| <i>Streptococcus iniae</i> SF1                    | GRM1       | YP_008055971 |
| <i>Streptococcus intermedius</i> ATCC 27335       | GRM1       | EPH05251     |
| <i>Streptococcus intermedius</i> JTH08            | GRM1       | YP_006469536 |
| <i>Clostridium ljungdahlii</i> DSM 13528          | GRM1*      | YP_003782109 |
| <i>Desulfosporosinus meridiei</i> DSM 13257       | GRM1*      | YP_006624072 |
| <i>Desulfosporosinus orientis</i> DSM 765         | GRM1*      | YP_004973312 |
| <i>Aeromonas hydrophila</i> ML09-119              | GRM2       | YP_008042577 |
| <i>Aeromonas hydrophila</i> ATCC 7966             | GRM2       | YP_855870    |
| <i>Enterobacter aerogenes</i> KCTC 2190           | GRM2       | YP_004592209 |
| <i>Escherichia coli</i> 536                       | GRM2       | YP_672437    |
| <i>Escherichia coli</i> IAI39                     | GRM2       | YP_002410085 |

|                                                   |         |              |
|---------------------------------------------------|---------|--------------|
| <i>Escherichia coli</i> O7:K1 str. CE10           | GRM2    | YP_006146235 |
| <i>Escherichia coli</i> UTI89                     | GRM2    | YP_543898    |
| <i>Klebsiella oxytoca</i> E718                    | GRM2    | YP_006496423 |
| <i>Klebsiella oxytoca</i> KCTC 1686               | GRM2    | YP_005017919 |
| <i>Klebsiella pneumoniae</i> 342                  | GRM2    | YP_002240668 |
| <i>Klebsiella variicola</i> At-22                 | GRM2    | YP_003441426 |
| <i>Proteus mirabilis</i> HI4320                   | GRM2    | YP_002152417 |
| <i>Raoultella ornithinolytica</i> B6              | GRM2    | YP_007875383 |
| <i>Serratia marcescens</i> FGI94                  | GRM2    | YP_007343022 |
| <i>Shimwellia blattae</i> DSM 4481                | GRM2    | YP_006318380 |
| <i>Vibrio furnissii</i> NCTC 11218                | GRM2    | YP_004991566 |
| <i>Clostridium beijerinckii</i> NCIMB 8052        | GRM3    | YP_001311127 |
| <i>Clostridium cf. saccharolyticum</i> K10        | GRM3    | YP_007849774 |
| <i>Clostridium ljungdahlii</i> DSM 13528          | GRM3    | YP_003779353 |
| <i>Clostridium novyi</i> NT                       | GRM3    | YP_878969    |
| <i>Escherichia coli</i> APEC O1                   | GRM3    | YP_859768    |
| <i>Escherichia coli</i> CFT073                    | GRM3    | NP_756397    |
| <i>Escherichia coli</i> ED1a                      | GRM3    | YP_002399331 |
| <i>Escherichia coli</i> S88                       | GRM3    | YP_002394164 |
| <i>Oscillibacter valericigenes</i> Sjm18-20       | GRM3    | YP_004881456 |
| <i>Pectobacterium wasabiae</i> WPP163             | GRM3    | YP_003261427 |
| <i>Raoultella ornithinolytica</i> B6              | GRM3    | YP_007872971 |
| <i>Rhodobacter capsulatus</i> SB 1003             | GRM3    | YP_003578348 |
| <i>Rhodospseudomonas palustris</i> BisB18         | GRM3    | YP_531045    |
| <i>Rhodospirillum rubrum</i> ATCC 11170           | GRM3    | YP_425991    |
| <i>Rhodospirillum rubrum</i> F11                  | GRM3    | YP_006047199 |
| <i>Vibrio sp.</i> EJY3                            | GRM3    | YP_005023152 |
| <i>Shewanella putrefaciens</i> CN-32              | GRM4    | YP_001181743 |
| <i>Shewanella sp.</i> W3-18-1                     | GRM4    | YP_961832    |
| <i>Clostridium phytofermentans</i> ISDg           | GRM5    | YP_001558291 |
| <i>Roseburia inulinivorans</i> DSM 16841          | GRM5    | EEG94456     |
| <i>Ruminococcus obeum</i> A2-162                  | GRM5    | YP_007805196 |
| <i>Ruminococcus sp.</i> SR1/5                     | GRM5    | YP_007783755 |
| <i>Ruminococcus torques</i> L2-14                 | GRM5    | YP_007786118 |
| <i>Desulfotobacterium dehalogenans</i> ATCC 51507 | GUF#    | YP_006428626 |
| <i>Desulfotobacterium hafniense</i> DCB-2         | GUF#    | YP_002456869 |
| <i>Desulfotobacterium hafniense</i> Y51           | GUF#    | YP_516649    |
| <i>Desulfotalea psychrophila</i> LSv54            | GUF#    | YP_066763    |
| <i>Escherichia fergusonii</i> ATCC 35469          | PDU/GRM | YP_002383121 |

\*Reclassified, previously GRM3. #Reclassified, previously GRM1.

**Table S2. GRM loci lacking genes encoding the iron-containing type of alcohol dehydrogenase (pfam00465).**

| <b>GRM loci types</b> | <b>Species</b>                                    |
|-----------------------|---------------------------------------------------|
| GRM1                  | <i>Desulfosporosinus acidiphilus</i> SJ4          |
| GRM1 (GRM3 outlier)   | <i>Clostridium ljungdahlii</i> DSM 13528          |
| GRM1 (GRM3 outlier)   | <i>Desulfosporosinus meridiei</i> DSM 13257       |
| GRM1 (GRM3 outlier)   | <i>Desulfosporosinus orientis</i> DSM 765         |
| GRM1 & GUF            | <i>Desulfitobacterium dehalogenans</i> ATCC 51507 |
| GRM1 & GUF            | <i>Desulfitobacterium hafniense</i> DCB-2         |
| GRM1 & GUF            | <i>Desulfitobacterium hafniense</i> Y51           |
| GRM1 & GUF            | <i>Desulfotalea psychrophila</i> LSv54            |
| GRM2                  | <i>Escherichia coli</i> IAI39                     |
| GRM5                  | <i>Clostridium phytofermentans</i> ISDg           |
| GRM5                  | <i>Roseburia inulinivorans</i> DSM 16841          |



## SUPPLEMENTAL FIGURE LEGENDS

**Figure S1. GRE active site comparisons. A.)** Stereo view superposition of a GRM3 GRE (*R. palustris* BisB18) homology model with the crystal structure of the glycerol-bound form of the B<sub>12</sub>-independent glycerol dehydratase (GDH) (PDB 1R9D). GRM3 GRE residues that are divergent from the ones in the GDH are colored in orange. The other residues are conserved in both active sites. Residues are numbered according to the GDH structure. Cysteine 433 is the residue that harbors the radical during catalysis. Serine 642 is replaced by a valine residue in all GRM3, GRM4, and GRM5 GREs. This valine would form an unfavorable short contact to the hydroxyl group of glycerol. This hydroxyl group is absent in propanediol. Tyrosine 339 of the GDH is replaced by a phenylalanine in all the GRE3-5, providing a more hydrophobic for the terminal methyl group of propanediol together with the conserved valine residue. **B.)** Stereo view superposition of homology models for the GRM1 GRE choline trimethylamine-lyase (CHL) from *D. alaskensis* G20 (blue) and the GUF of *D. hafniense* Y51 (orange). The first letters and the numbering correspond to the residues of the CHL. The second letters represents the residues that differ in the GUF. All residues shown are in close proximity to the catalytic radical cysteine (C489 in the CHL), and are conserved in the CHLs or GUFs, respectively. The only exception is threonine 431, which can be replaced by serine in some of the GRM1 GREs.

**Figure S2. Homology model of the GRM2 GRE and schematics of possible protein interactions.**

**A.)** Dimer of the B<sub>12</sub>-independent glycerol dehydratase (GDH) (PDB 1R9D). **B.)** Homology model (created with RaptorX) of the GRM2 GRE that includes the N-terminal ~350 residues long extension (outlined in red). The modeled extension resembles the first part of the catalytic domain of the GRE (outlined in yellow). The latter is shown in the same orientation as the dark blue subunit of the GDH in panel A. **C.)** Schematic for a possible coalescence of the GRM2 GRE within the microcompartment.

The coalescence may be facilitated by the N-terminal partial catalytic domain, by replacing another catalytic domain in the dimer interface. **D.)** Schematic for a possible role of the N-terminal extension domain in the interaction with the BMC shell, similar to encapsulation peptides. Note that in contrast to the other BMC associated GREs, the GRM2 GREs do not contain any apparent encapsulation peptides.

**Figure S3. Alignment of the insertion domains within the activating enzymes containing additional Fe-S cluster motifs.** Sequence alignment used to construct the phylogeny of the activating enzymes (Figure 2B) depicting the insertion domains that comprise the ferredoxin-like [4Fe-4S] cluster motifs. Cysteine residues are highlighted in orange. Species names and GRM classifications are provided on the left, whereas the total number of [4Fe-4S] clusters present in the respective activating enzyme is noted on the right.

**Figure S4. Phylogenetic tree for the GRM prevalent iron containing type of alcohol dehydrogenases (ADHs).** The Maximum Likelihood tree of the ADHs was inferred from 67 amino acid sequences. The counterparts from the canonical PDU and EUT BMCs, PduQ and EutG, respectively, have been included for comparison. Bootstrap values for important nodes are represented as filled circles (above 50%) and empty circles (below 50%).

**Figure S5. Phylogenetic trees of BMC-H, BMC-T and BMC-P shell proteins**

Maximum Likelihood trees of the BMC-H, BMC-T, and BMC-P proteins were inferred from 354, 67 and 82 amino acid sequences, respectively. Bootstrap values for important nodes are represented as filled circles (above 50%) and empty circles (below 50%).

**Figure S6. Proposed evolution of the *C. ljungdahlii* GRM locus.** The borders of duplication and deletion were determined based on dot plot analysis (Figure S1). The order of operations was inferred based on the observation that the PduL homolog and AldDH in both loci were nested within the GRM1 clades in their respective phylogenetic trees. CHL – choline trimethylamine-lyase, PDH - propanediol dehydratase.

## SUPPLEMENTAL FIGURES

**Figure S1**

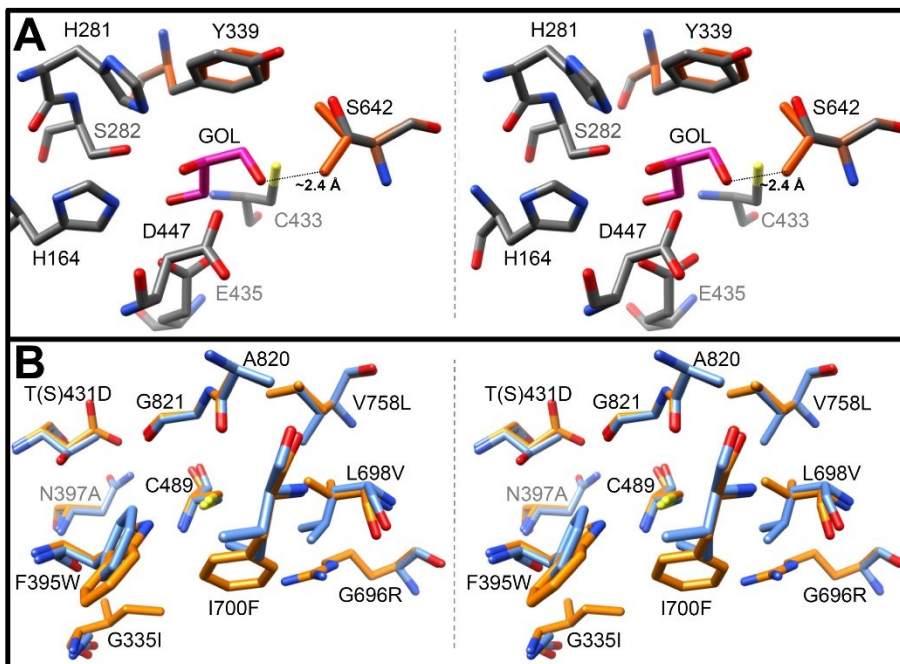

Figure S2.

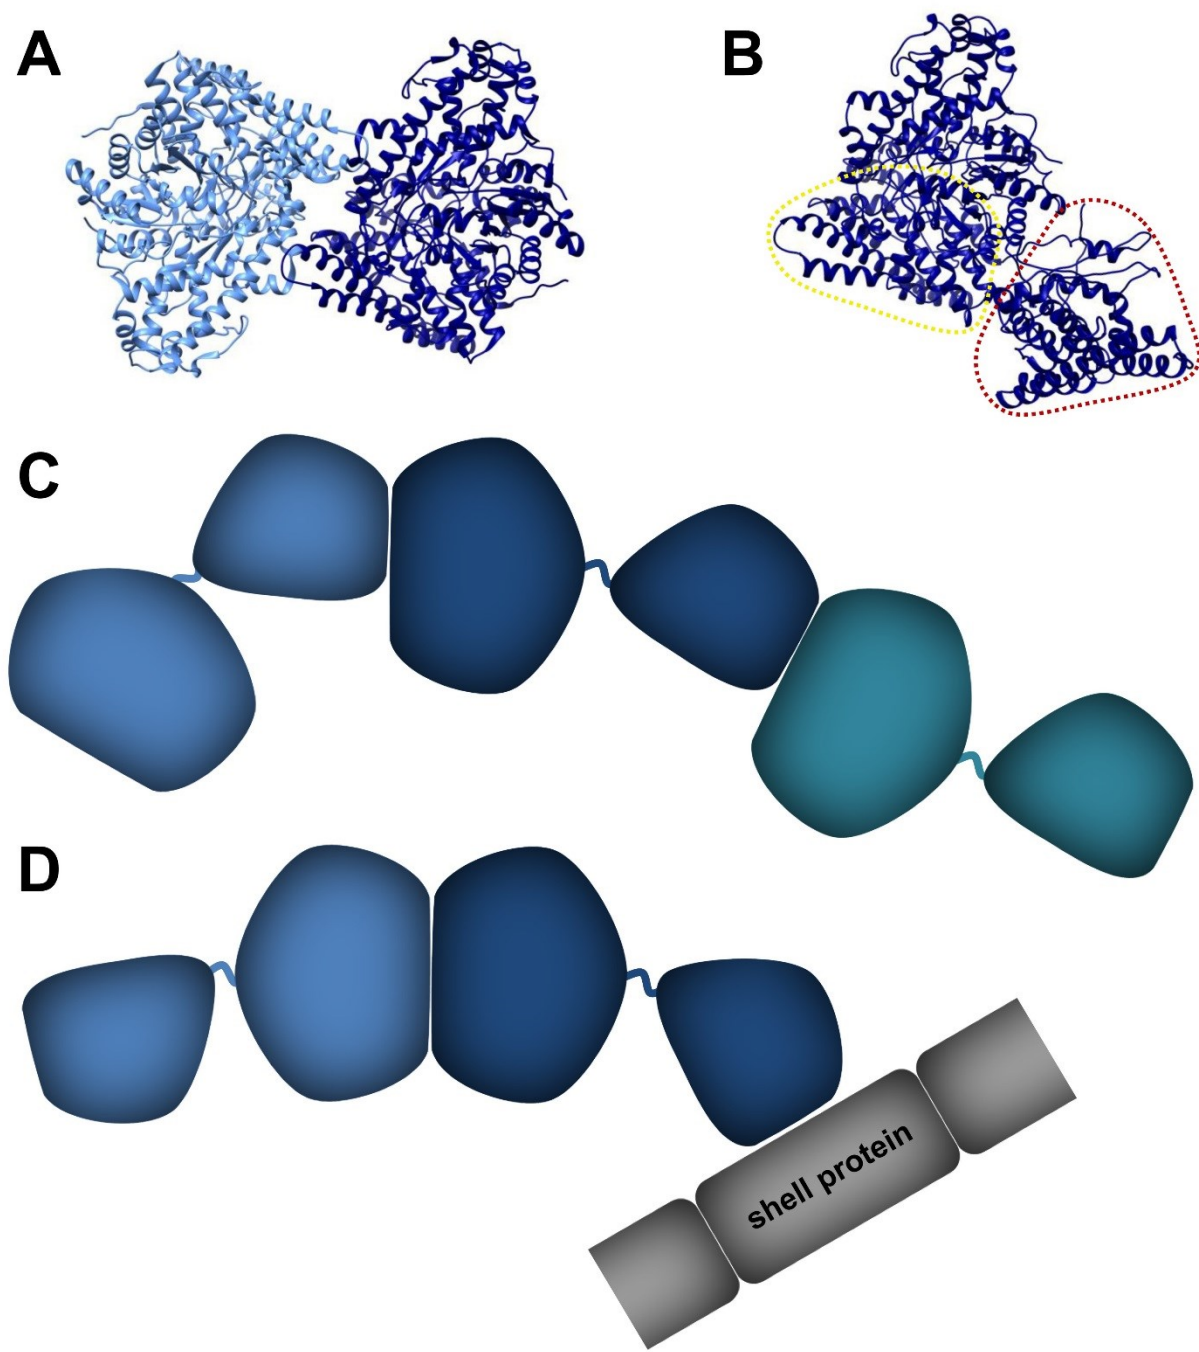

Figure S3.

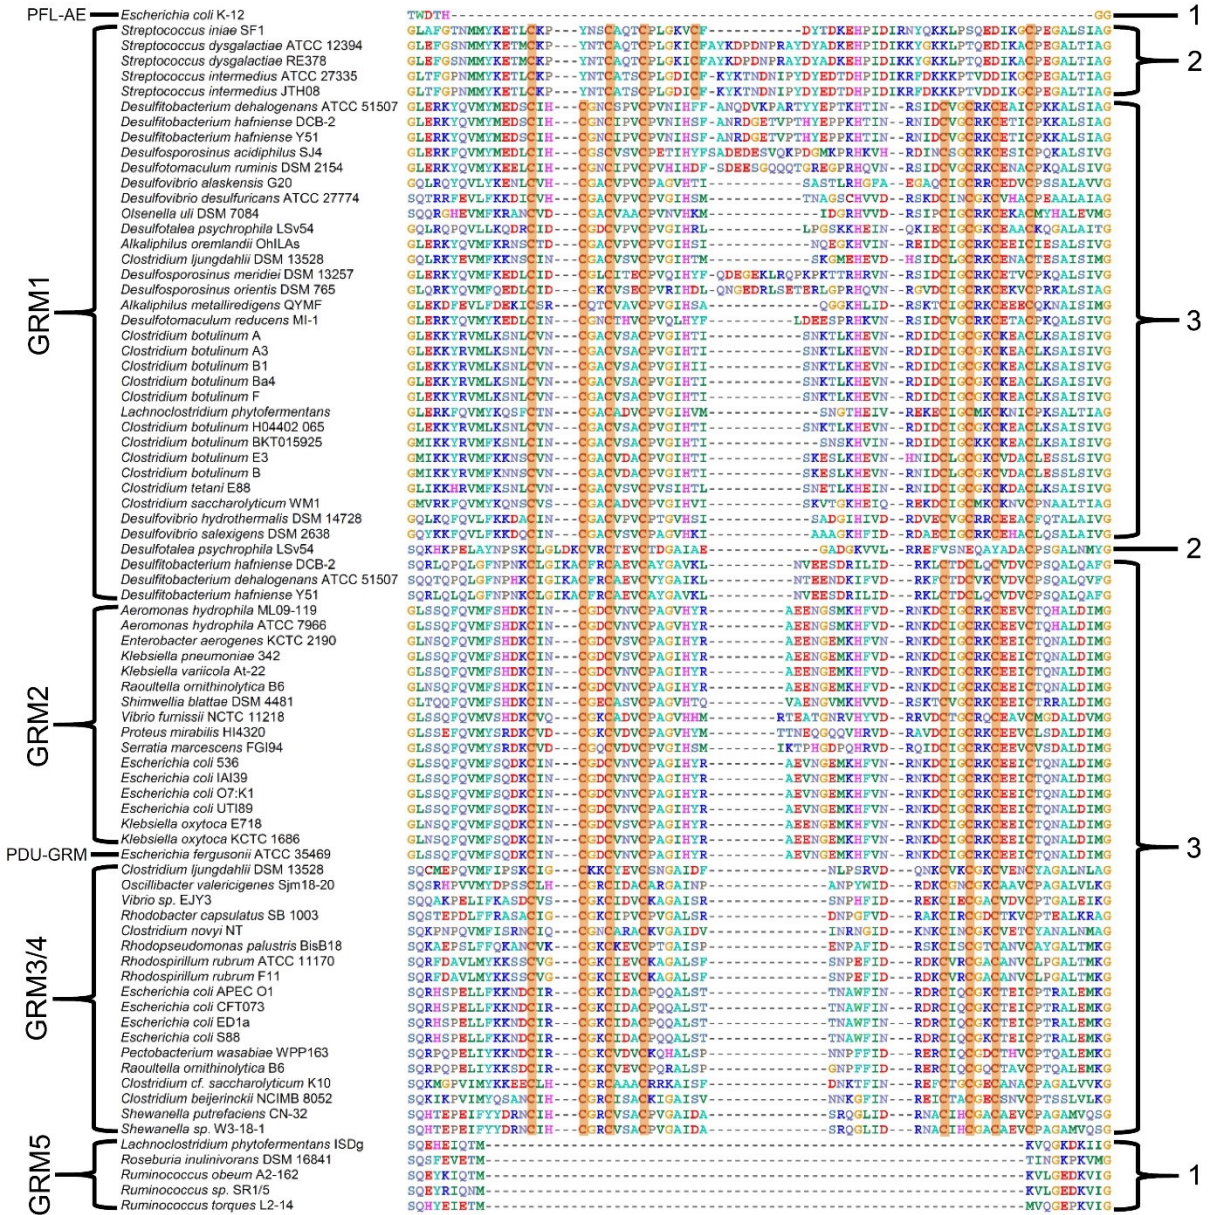

Figure S4.

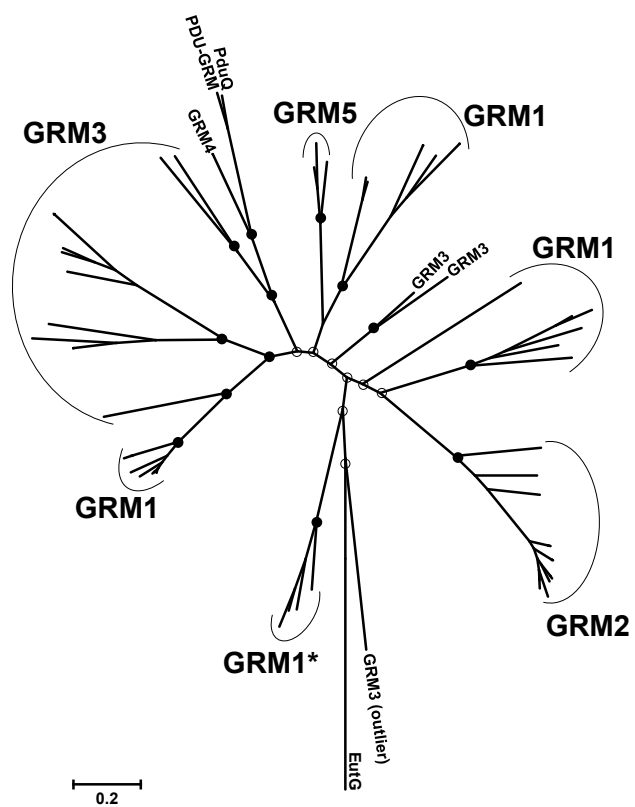

Figure S5.

**BMC-H**

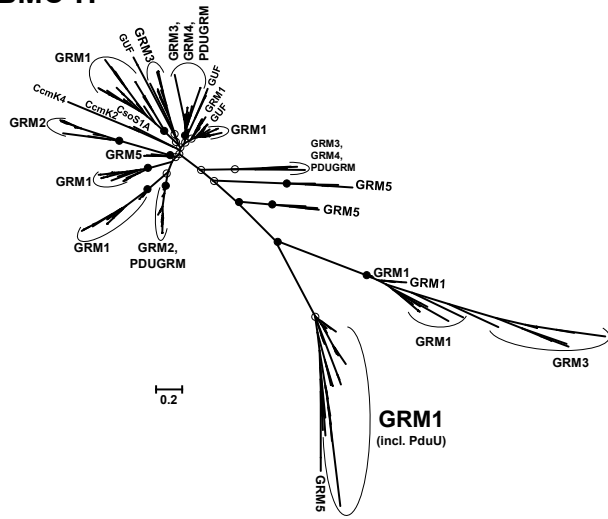

**BMC-T**

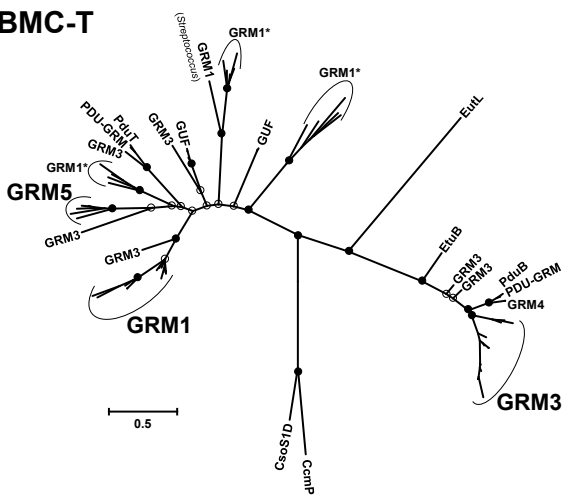

**BMC-P**

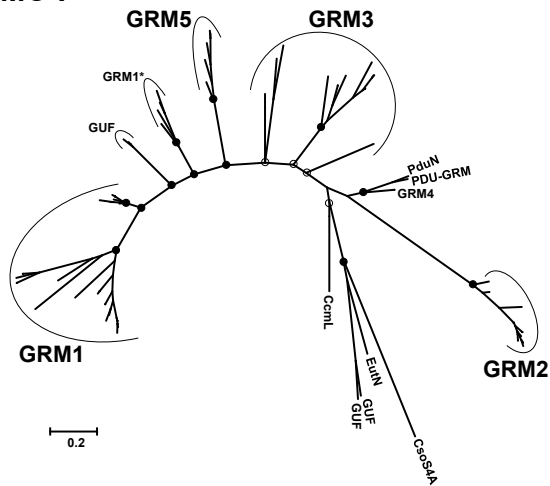

**Figure S6.**

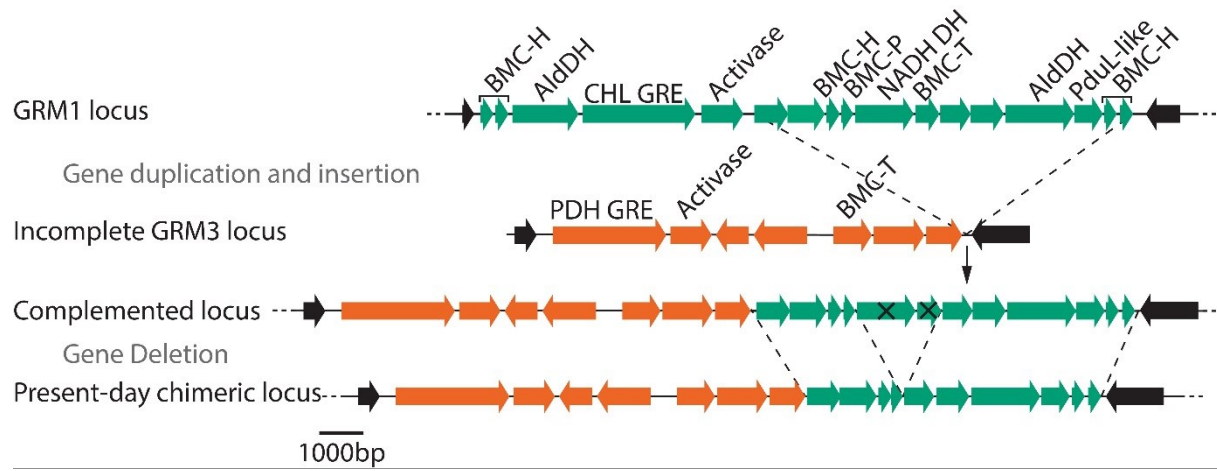

Supplement: AEM.02587-15_zam999116772so1.pdf [file AEM.02587-15_zam999116772so1.pdf]
